# Supplementary material for: Protein arginine methyltransferase 6 controls erythroid gene expression and differentiation of human CD34+ progenitor cells
Source: PubMed Central journal article supplement — Haematologica. 2017 Oct 12;103(1):18–29. doi: 10.3324/haematol.2017.174516 (PMC5777187; doi:10.3324/haematol.2017.174516), 2018-01
Supplement: 2017_174516-Disclosures_and_Contributions.pdf [file 2017_174516-Disclosures_and_Contributions.pdf]

Haematologica  
HAEMATOL/2017/174516  
Version 4

Protein arginine methyltransferase 6 controls erythroid gene expression  
and differentiation of human CD34+ progenitor cells

Stefanie C. Herkt, Olga N. Kuvardina, Julia Herglotz, Lucas Schneider,  
Annekarin Meyer, Claudia Pommerenke, Gabriela Salinas-Riester,  
Erhard Seifried, Halvard Bonig, and Jörn Lausen

Disclosures: none

Contributions: Contribution: S.C.H. performed, designed and analysed experiments. O.N.K., J.H., L.S and A.M. performed experiments. C.P. and G.S.R. performed and analysed gene expression arrays. E.S. and H.B. provided essential material and gave advice. J.L. performed experiments, supervised the study and wrote the manuscript.
